# Supplementary material for: ATRP catalysts of tetradentate guanidine ligands – do guanidine donors induce a faster atom transfer?
Source: Royal Society of Chemistry journal article supplement (doi:10.1039/d3dt03392a), 2024-01-01
Supplement: d3dt03392a1.pdf [file d3dt03392a1.pdf]

## Electronic Supplementary Information (ESI)

### ATRP Catalysts of Tetradentate Guanidine Ligands – Do Guanidine Donors Induce a Faster Atom Transfer?

Konstantin W. Kröckert,<sup>a</sup> Felix Garg,<sup>a</sup> Joshua Heck,<sup>a</sup> Michel V. Heinz,<sup>a</sup> Justin Lange,<sup>a</sup> Regina Schmidt,<sup>a</sup> Alexander Hoffmann<sup>a</sup> and Sonja Herres-Pawlis\*<sup>a</sup>

#### Table of Contents

|                                              |    |
|----------------------------------------------|----|
| Synthesis of L1.....                         | 2  |
| Cristallographic Data and Parameters.....    | 3  |
| UV/Vis spectra.....                          | 5  |
| EPR.....                                     | 6  |
| Cyclic voltammograms.....                    | 7  |
| NMR spectra.....                             | 10 |
| PXRD spectrum.....                           | 14 |
| DFT calculations of the complex cations..... | 15 |
| Polymerisations.....                         | 17 |
| Ligand structures.....                       | 20 |
| References.....                              | 21 |

---

<sup>a</sup> Institute of Inorganic Chemistry, RWTH Aachen University, Landoltweg 1a, 52074 Aachen (Germany). E-mail: sonja.herres-pawlis@ac.rwth-aachen.de

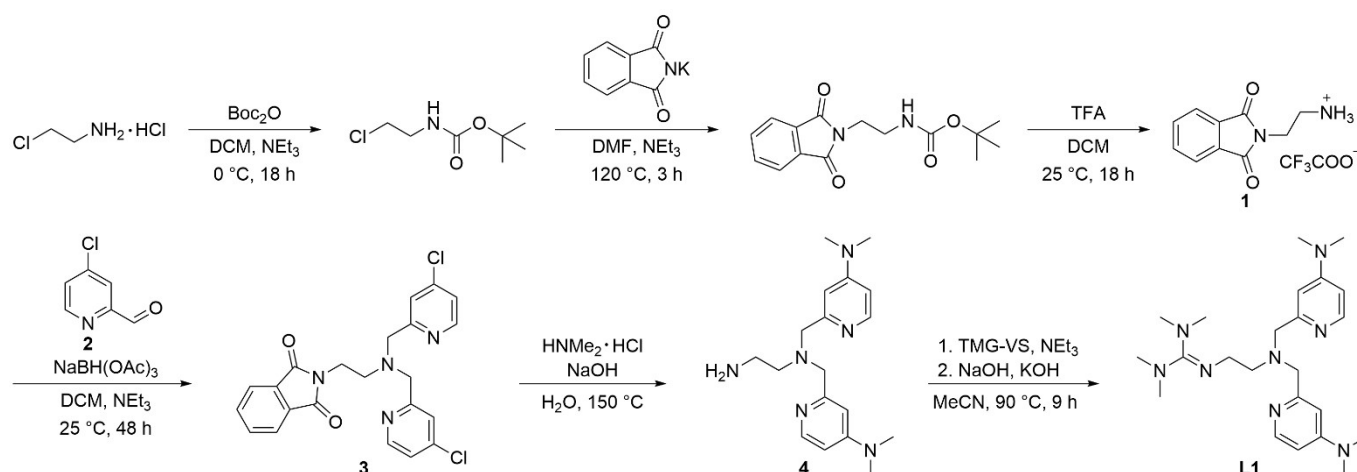

**Scheme S1:** Synthetic route to the ligand TMG-4NMe<sub>2</sub>uns-penp (**L1**).

## Synthesis of L1

### Resynthesis of *tert*-Butyl(2-chloroethyl)carbamate<sup>1</sup>

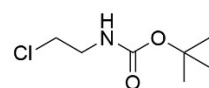

2-Chloroethylamine hydrochloride (15.0 g, 129 mmol, 1 eq.) and NEt<sub>3</sub> (13.1 g, 129 mmol, 1 eq.) were dissolved in DCM (200 mL). Boc<sub>2</sub>O (28.2 g, 129 mmol, 1 eq.) was added at 0 °C and the solution was stirred for 18 h. After washing with water the organic phase was dried over Na<sub>2</sub>SO<sub>4</sub> and the solvent was removed under reduced pressure (Yield = 95 %, 22.0 g, 123 mmol). <sup>1</sup>H NMR (400 MHz, CDCl<sub>3</sub>): δ = 4.95 (br. s, 1H), 3.59 (t, *J* = 5.6 Hz, 2H), 3.46 (q, *J* = 5.4 Hz, 2H), 1.44 (s, 9H) ppm. Additional information on the synthesis of the target compound and original analysis data files are available via Chemotion Repository: <https://dx.doi.org/10.14272/reaction/SA-FUHFF-UHFFFADPSC-VACLXTYDF-UHFFFADPSC-NUHFF-NUHFF-NUHFF-ZZZ>

### Resynthesis of *tert*-Butyl(2-(1,3-dioxoisindolin-2-yl)ethyl)carbamate<sup>2,3</sup>

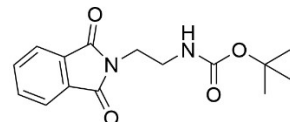

*tert*-Butyl(2-chloroethyl)carbamate (22.0 g, 123 mmol, 1 eq.) and potassium phthalimide (22.7 g, 122.6 mmol, 1 eq.) were dissolved in DMF (250 mL). The solution was stirred for 3 h at 120 °C and after cooling to room temperature it was poured into water (600 mL). The white precipitate was washed with water, solved in DCM (200 mL) and washed again with water (1 x 200 mL). The organic phase was dried over Na<sub>2</sub>SO<sub>4</sub> and the solvent was removed under reduced pressure (Yield = 88 %, 31.3 g, 108 mmol). <sup>1</sup>H NMR (400 MHz, CDCl<sub>3</sub>): δ = 7.87 – 7.83 (m, 2H), 7.74 – 7.69 (m, 2H), 4.82 (br. s, 1H), 3.83 (dd, *J* = 6.3, 5.0 Hz, 2H), 3.49 – 3.36 (m, 2H), 1.34 (s, 9H) ppm. Additional information on the synthesis of the target compound and original analysis data files are available via Chemotion Repository: <https://dx.doi.org/10.14272/reaction/SA-FUHFF-UHFFFADPSC-ZBUIOQRB1-UHFFFADPSC-NUHFF-NUHFF-NUHFF-ZZZ>

### Resynthesis of 2-(1,3-Dioxoisindolin-2-yl)ethan-1-aminium 2,2,2-trifluoroacetate<sup>3</sup>

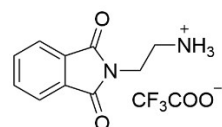

*tert*-Butyl(2-(1,3-dioxoisindolin-2-yl)ethyl)carbamate (31.3 g, 108 mmol, 1 eq.) was diluted in DCM (100 mL). TFA (207 mL, 2.70 mol, 25 eq.) was added and the reaction mixture was stirred for 18 h at 25 °C. The solvent and residual TFA were removed under reduced pressure to yield a yellow oil. It was dissolved in DCM (5 mL) and slowly added to a stirred mixture of 200 mL Et<sub>2</sub>O and hexane (1/1) which results in precipitated product (Yield = 91 %, 30.0 g, 98.6 mmol). <sup>1</sup>H NMR (400 MHz, DMSO-*d*<sub>6</sub>): δ = 7.96 – 7.77 (m, 7H), 3.84 (t, *J* = 5.9 Hz, 2H), 3.09 (t, *J* = 5.9 Hz, 2H) ppm. Additional information on the synthesis of the target compound and original analysis data files are available via Chemotion Repository: <https://dx.doi.org/10.14272/reaction/SA-FUHFF-UHFFFADPSC-MGKZRLPYSB-UHFFFADPSC-NUHFF-NUHFF-NUHFF-ZZZ>

### Resynthesis of 4-Chloropicolinaldehyde<sup>4</sup>

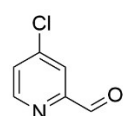

Activated MnO<sub>2</sub> (57.29 g, 659.0 mmol, 12.4 eq.) was suspended in CHCl<sub>3</sub> (95 mL) and (4-chloropyridin-2-yl)methanol (7.63 g, 53.15 mmol, 1 eq.) was added. The suspension was refluxed for 2 h, was hot filtered over Celite on a glass filter and washed with CHCl<sub>3</sub>. The solvent was evaporated under reduced pressure to receive the product (Yield = 64 %, 4.83 g, 34.1 mmol). <sup>1</sup>H NMR (400 MHz, CDCl<sub>3</sub>): δ = 10.05 (s, 1H), 8.69 (d, *J* = 5.0 Hz, 1H), 7.94 (d, *J* = 1.5 Hz, 1H), 7.52 (dd, *J* = 5.0, 1.5 Hz, 1H) ppm. Additional information on the synthesis of the target compound

and original analysis data files are available via Chemotion Repository: <https://dx.doi.org/10.14272/reaction/SA-FUHFF-UHFFFADPSC-NZLNQSUMFS-UHFFFADPSC-NUHFF-NUHFF-NUHFF-ZZZ>

## Cristallographic Data and Parameters

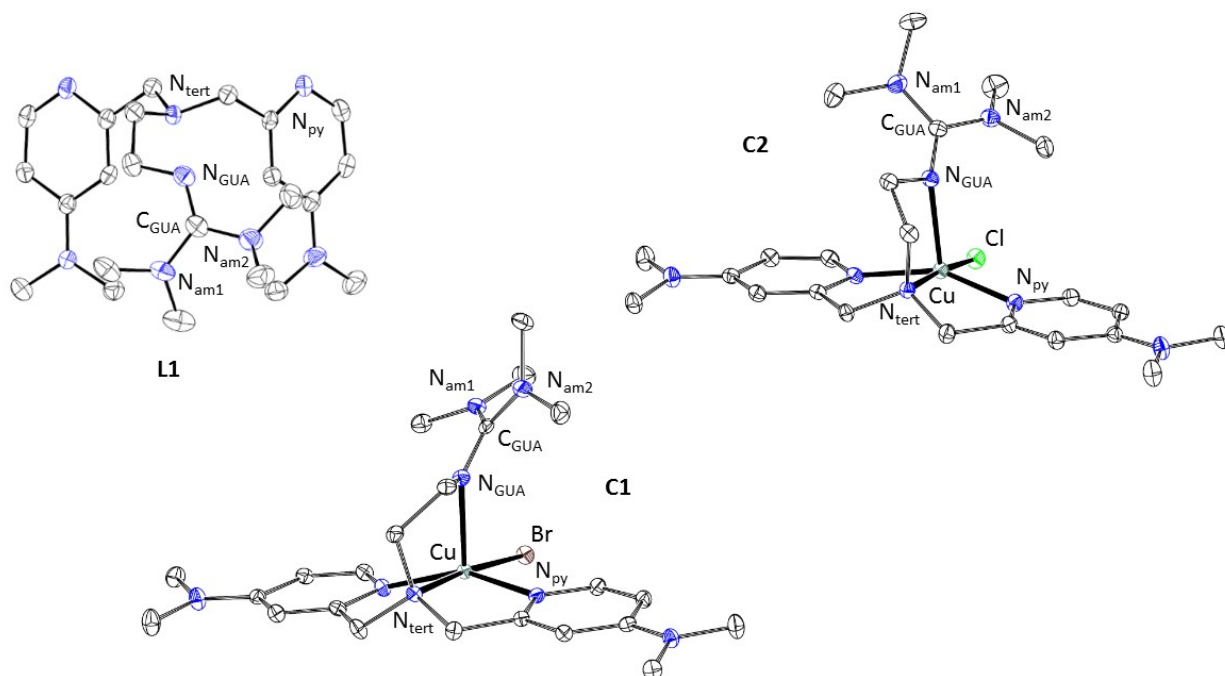

**Fig. S1:** Molecular structure of the ligand **L1** or of the cationic complex units of [Cu(TMG-4NMe<sub>2</sub>uns-penp)Br]Br (**C1**) and [Cu(TMG-4NMe<sub>2</sub>uns-penp)Cl]Cl (**C2**) in the solid state (ellipsoids drawn at the 50% probability level). H atoms, not coordinating anions and solvent molecules are omitted for clarity.

**Table S1:** Crystallographic data and parameters of the ligand **L1** and Cu(II) complexes **C1** and **C2**.

| Complex/Ligand                                | <b>L1</b>                                      | <b>C1</b>                                                        | <b>C2</b>                                                        |
|-----------------------------------------------|------------------------------------------------|------------------------------------------------------------------|------------------------------------------------------------------|
| Empirical formula                             | C <sub>23</sub> H <sub>33</sub> N <sub>8</sub> | C <sub>23</sub> H <sub>38</sub> Br <sub>2</sub> CuN <sub>8</sub> | C <sub>23</sub> H <sub>38</sub> Cl <sub>2</sub> CuN <sub>8</sub> |
| Formula mass [g mol <sup>-1</sup> ]           | 426.61                                         | 649.97                                                           | 561.05                                                           |
| Crystal size [mm]                             | 0.25 x 0.20 x 0.18                             | 0.21 x 0.18 x 0.14                                               | 0.16 x 0.14 x 0.10                                               |
| T [K]                                         | 100(2)                                         | 100(2)                                                           | 100(2)                                                           |
| Crystal system                                | Triclinic                                      | Monoclinic                                                       | Monoclinic                                                       |
| Space group                                   | <i>P</i> $\bar{1}$                             | <i>P</i> <sub>2<sub>1</sub></sub> / <i>n</i>                     | <i>P</i> <sub>2<sub>1</sub></sub> / <i>n</i>                     |
| a [Å]                                         | 8.624(3)                                       | 8.4759(17)                                                       | 8.2624(17)                                                       |
| b [Å]                                         | 9.128(3)                                       | 22.426(5)                                                        | 22.189(4)                                                        |
| c [Å]                                         | 15.701(5)                                      | 14.174(3)                                                        | 14.293(3)                                                        |
| α [°]                                         | 76.082(6)                                      | 90                                                               | 90                                                               |
| β [°]                                         | 85.831(6)                                      | 95.99(3)                                                         | 95.53(3)                                                         |
| γ [°]                                         | 77.379(6)                                      | 90                                                               | 90                                                               |
| V [Å <sup>3</sup> ]                           | 1170.6(6)                                      | 2679.6(9)                                                        | 2608.2(9)                                                        |
| Z                                             | 2                                              | 4                                                                | 4                                                                |
| ρ <sub>calcd.</sub> [g cm <sup>-3</sup> ]     | 1.210                                          | 1.611                                                            | 1.429                                                            |
| μ [mm <sup>-1</sup> ]                         | 0.076                                          | 3.825                                                            | 1.071                                                            |
| λ [Å]                                         | 0.71073                                        | 0.71073                                                          | 0.71073                                                          |
| F(000)                                        | 464                                            | 1324                                                             | 1180                                                             |
| hkl range                                     | -10/10, -11/11, -18/18                         | -10/9, -19/27, -17/16                                            | -8/12, -33/33, -19/21                                            |
| Reflections collected                         | 13304                                          | 29466                                                            | 67965                                                            |
| Independent reflections                       | 4333                                           | 4973                                                             | 9614                                                             |
| R <sub>int.</sub>                             | 0.0913                                         | 0.0228                                                           | 0.0676                                                           |
| No. parameters                                | 289                                            | 315                                                              | 315                                                              |
| R <sub>1</sub> [I ≥ 2σ(I)]                    | 0.0573                                         | 0.03082                                                          | 0.0309                                                           |
| wR <sub>2</sub> (all data)                    | 0.1352                                         | 0.0651                                                           | 0.0780                                                           |
| Goodness-of-fit                               | 0.934                                          | 1.271                                                            | 0.944                                                            |
| Δρ <sub>fin</sub> max/min [eÅ <sup>-3</sup> ] | 0.237/-0.227                                   | 1.078/-0.715                                                     | 0.455/-0.480                                                     |

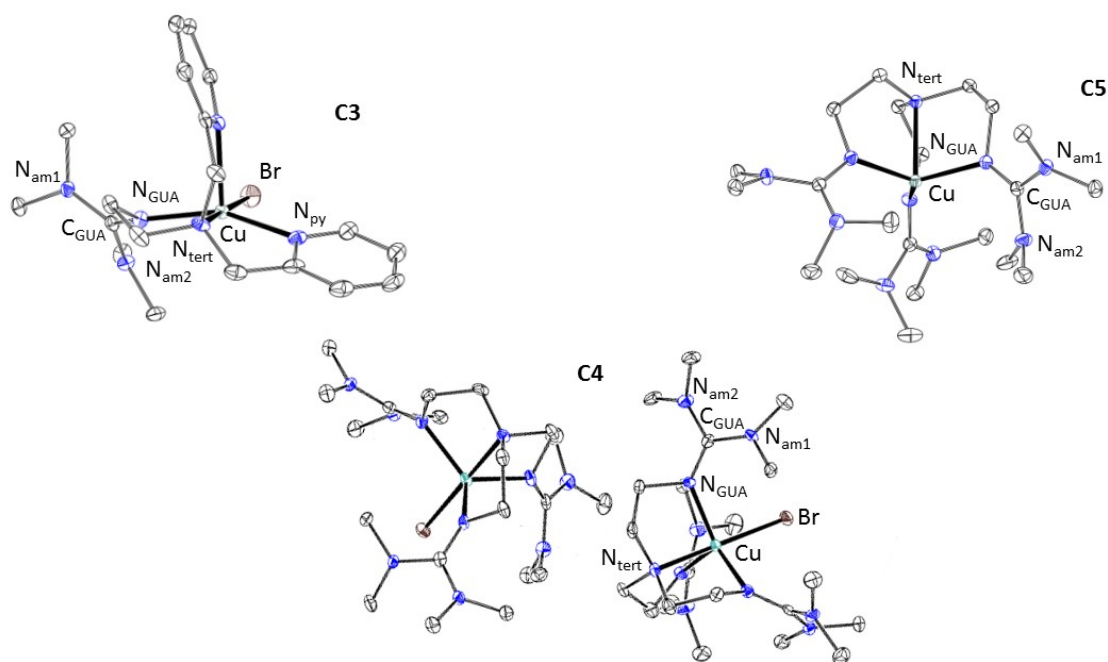**Fig. S2:** Molecular structures of the cationic complex units of [Cu(TMG-uns-penp)Br]Br-MeCN (**C3**), [Cu(TMG<sub>3</sub>tren)Br]Br (**C4**) and of the complex [Cu(TMG<sub>3</sub>tren)]Br-toluene (**C5**) in the solid state (ellipsoids drawn at the 50% probability level). H atoms, not coordinating anions and solvent molecules are omitted for clarity.

**Table S2:** Crystallographic data and parameters of the Cu(II) complexes **C3**, **C4** and **C5**.

| Complex/Ligand                                | <b>C3</b>                                                        | <b>C4</b>                                                         | <b>C5</b>                                                                             |
|-----------------------------------------------|------------------------------------------------------------------|-------------------------------------------------------------------|---------------------------------------------------------------------------------------|
| Empirical formula                             | C <sub>21</sub> H <sub>31</sub> Br <sub>2</sub> CuN <sub>7</sub> | C <sub>21</sub> H <sub>48</sub> Br <sub>2</sub> CuN <sub>10</sub> | C <sub>21</sub> H <sub>48</sub> BrCuN <sub>10</sub> [+C <sub>7</sub> H <sub>8</sub> ] |
| Formula mass [g mol <sup>-1</sup> ]           | 604.89                                                           | 664.05                                                            | 584.14                                                                                |
| Crystal size [mm]                             | 0.26 x 0.23 x 0.20                                               | 0.26 x 0.25 x 0.23                                                | 0.21 x 0.15 x 0.12                                                                    |
| T [K]                                         | 100(2)                                                           | 100(2)                                                            | 100(2)                                                                                |
| Crystal system                                | Monoclinic                                                       | Monoclinic                                                        | Trigonal                                                                              |
| Space group                                   | <i>P</i> 2 <sub>1</sub> / <i>c</i>                               | <i>P</i> 2 <sub>1</sub> / <i>n</i>                                | <i>R</i> 3                                                                            |
| a [Å]                                         | 14.006(3)                                                        | 17.874(4)                                                         | 11.8799(17)                                                                           |
| b [Å]                                         | 14.715(3)                                                        | 18.131(4)                                                         | 11.8799(17)                                                                           |
| c [Å]                                         | 12.068(2)                                                        | 17.985(4)                                                         | 35.794(7)                                                                             |
| α [°]                                         | 90                                                               | 90                                                                | 90                                                                                    |
| β [°]                                         | 90.33(3)                                                         | 81.20(3)                                                          | 90                                                                                    |
| γ [°]                                         | 90                                                               | 90                                                                | 120                                                                                   |
| V [Å <sup>3</sup> ]                           | 2487.2(8)                                                        | 5827(2)                                                           | 4374.9(15)                                                                            |
| Z                                             | 4                                                                | 8                                                                 | 6                                                                                     |
| ρ <sub>calcd.</sub> [g cm <sup>-3</sup> ]     | 1.615                                                            | 1.514                                                             | 1.330                                                                                 |
| μ [mm <sup>-1</sup> ]                         | 4.114                                                            | 3.521                                                             | 2.146                                                                                 |
| λ [Å]                                         | 0.71073                                                          | 0.71073                                                           | 0.71073                                                                               |
| F(000)                                        | 1220                                                             | 2744                                                              | 1848                                                                                  |
| <i>hkl</i> range                              | -17/17, -18/17, -11/14                                           | -19/22, -23/23, -21/22                                            | -18/18, -18/18, -56/29                                                                |
| Reflections collected                         | 49459                                                            | 108428                                                            | 33104                                                                                 |
| Independent reflections                       | 4873                                                             | 12711                                                             | 3801                                                                                  |
| <i>R</i> <sub>int.</sub>                      | 0.0331                                                           | 0.1345                                                            | 0.0716                                                                                |
| No. parameters                                | 285                                                              | 637                                                               | 104                                                                                   |
| <i>R</i> <sub>1</sub> [I ≥ 2σ( <i>I</i> )]    | 0.0422                                                           | 0.0475                                                            | 0.0359                                                                                |
| w <i>R</i> <sub>2</sub> (all data)            | 0.1206                                                           | 0.1135                                                            | 0.0818                                                                                |
| Goodness-of-fit                               | 1.054                                                            | 1.085                                                             | 1.023                                                                                 |
| Δρ <sub>fin</sub> max/min [eÅ <sup>-3</sup> ] | 1.069/-2.027                                                     | 1.174/-0.820                                                      | 0.536/-0.525                                                                          |

**Table S3:** Key bond lengths, angles and geometrical factors for both crystallographic independent molecules in the asymmetric unit of [Cu(TM<sub>G</sub>3tren)Br]Br (**C4**).

| Complex                                    | <b>C4</b>                                     |                                               |
|--------------------------------------------|-----------------------------------------------|-----------------------------------------------|
|                                            | <b>Bond lengths [Å]</b>                       |                                               |
| Cu-N <sub>ax</sub>                         | 2.112(3); N <sub>ax</sub> = N <sub>tert</sub> | 2.113(3); N <sub>ax</sub> = N <sub>tert</sub> |
| Cu-N <sub>eq</sub> (1)                     | 2.061(3); N <sub>eq</sub> = N <sub>GUA</sub>  | 2.110(3); N <sub>eq</sub> = N <sub>GUA</sub>  |
| Cu-N <sub>eq</sub> (2)                     | 2.065(3); N <sub>eq</sub> = N <sub>GUA</sub>  | 2.100(3); N <sub>eq</sub> = N <sub>GUA</sub>  |
| Cu-N <sub>eq</sub> (3)                     | 2.138(3); N <sub>eq</sub> = N <sub>GUA</sub>  | 2.097(3); N <sub>eq</sub> = N <sub>GUA</sub>  |
| Cu-X                                       | 2.447(1); X = Br                              | 2.440(1); X = Br                              |
| C <sub>GUA</sub> -N <sub>GUA</sub>         | 1.311 (av.)                                   | 1.309 (av.)                                   |
| C <sub>GUA</sub> -N <sub>am1</sub>         | 1.361 (av.)                                   | 1.376 (av.)                                   |
| C <sub>GUA</sub> -N <sub>am2</sub>         | 1.360 (av.)                                   | 1.366 (av.)                                   |
| <b>Bond angles [°]</b>                     |                                               |                                               |
| N <sub>ax</sub> -Cu-X                      | 179.4(1)                                      | 179.6(1)                                      |
| N <sub>eq</sub> (1)-Cu-X                   | 98.8(1)                                       | 98.7(1)                                       |
| N <sub>ax</sub> -Cu-N <sub>eq</sub> (1)    | 81.8(2)                                       | 81.6(2)                                       |
| N <sub>ax</sub> -Cu-N <sub>eq</sub> (2)    | 82.3(2)                                       | 82.0(2)                                       |
| N <sub>ax</sub> -Cu-N <sub>eq</sub> (3)    | 81.8(2)                                       | 81.9(2)                                       |
| N <sub>eq</sub> (1)-Cu-N <sub>eq</sub> (2) | 122.3(2)                                      | 119.5(2)                                      |
| N <sub>eq</sub> (1)-Cu-N <sub>eq</sub> (3) | 113.1(2)                                      | 115.7(2)                                      |
| N <sub>eq</sub> (2)-Cu-N <sub>eq</sub> (3) | 118.8(2)                                      | 118.8(2)                                      |
| <b>Geometrical factors</b>                 |                                               |                                               |
| $\tau_5^{[a]}$                             | 1.01                                          | 1.00                                          |
| $\rho^{[b]}$                               | 0.96                                          | 0.96                                          |

[a]  $\tau_5 = \frac{(\alpha - \beta)}{60^\circ}$ . Ideal square pyramidal complexes generate a  $\tau_5$  value of 0 where ideal trigonal bipyramidal complexes generate a  $\tau_5$  value of 1.<sup>5</sup>

[b]  $\rho = \frac{2a}{(b + c)}$  with  $a = d(C_{GUA}=N_{GUA})$  and  $b$  and  $c = d(C_{GUA}-N_{am})$ .<sup>6</sup>

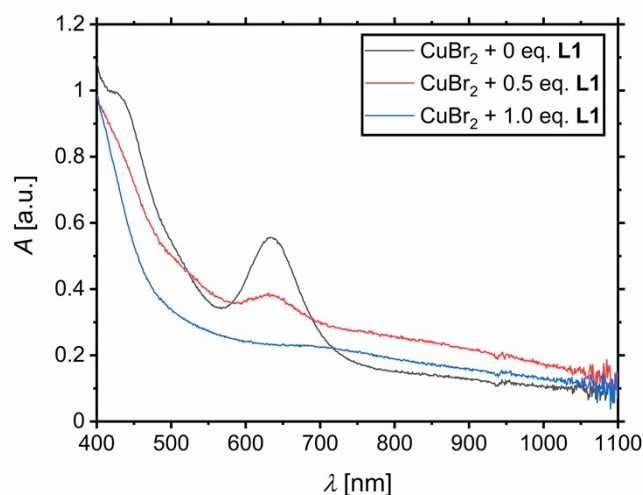**Fig. S3:** UV/Vis spectra for 5 mM CuBr<sub>2</sub> in MeCN with 0 eq., 0.5 eq. or 1 eq. of TMG-4NMe<sub>2</sub>uns-penp (**L1**).

## UV/Vis spectra

## EPR

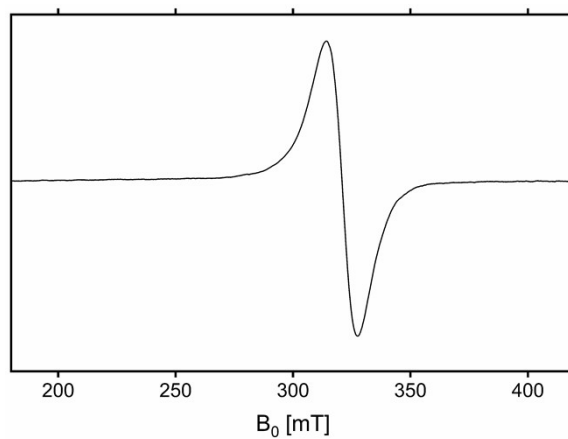

**Fig. S4:** Experimental X-band EPR spectrum of a frozen 5 mM **C1** complex solution in MeCN at 77 K.

---

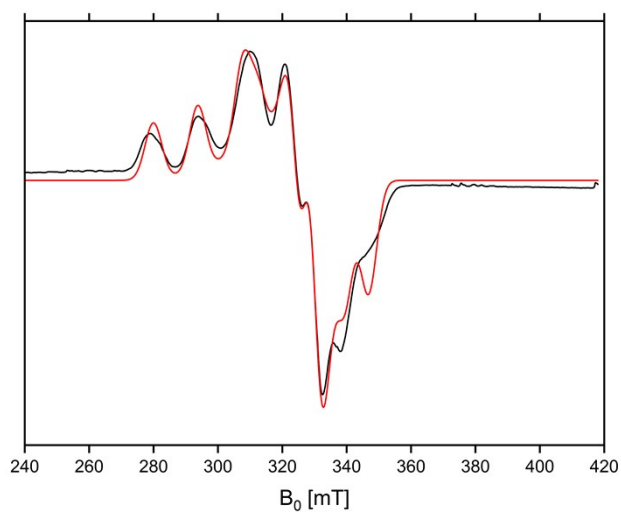

**Fig. S5:** Simulated and experimental X-band EPR spectra of frozen 5 mM **C1** complex solution in MeCN at 77 K.

---

## Cyclic voltammograms

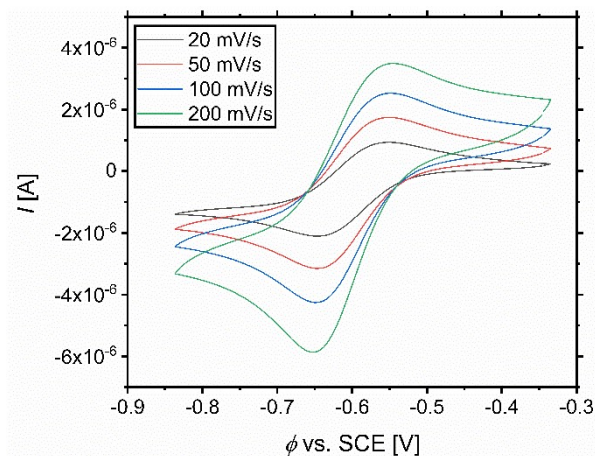

Fig. S6: Cyclic voltammograms with various scan rates of the Cu<sup>I</sup>/Cu<sup>II</sup> couple starting from a 1 mM [Cu(TMG-4NMe<sub>2</sub>uns-penp)Cl]Cl (C2) complex solution in MeCN.

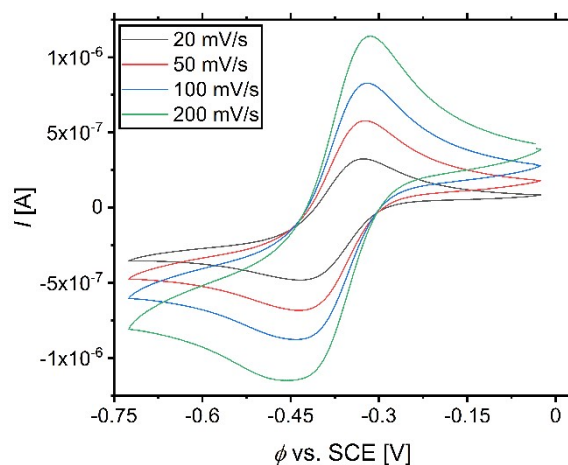

Fig. S7: Cyclic voltammograms with various scan rates of the Cu<sup>I</sup>/Cu<sup>II</sup> couple starting from a 1 mM [Cu(TMG-4NMe<sub>2</sub>uns-penp)](OTf)<sub>2</sub> complex solution in MeCN.

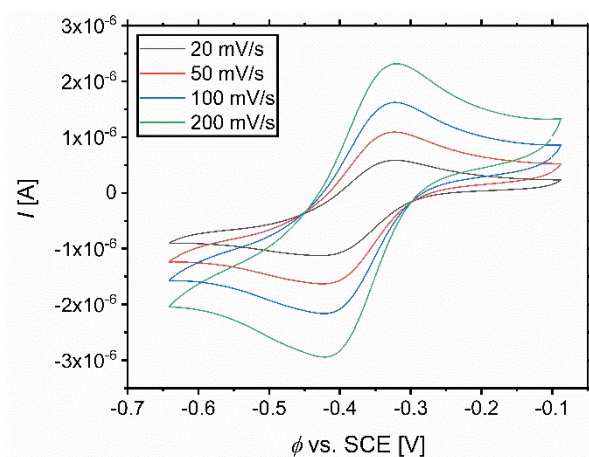

Fig. S8: Cyclic voltammograms with various scan rates of the Cu<sup>I</sup>/Cu<sup>II</sup> couple starting from a 1 mM [Cu(TMG-uns-penp)Br]Br (C3) complex solution in MeCN.



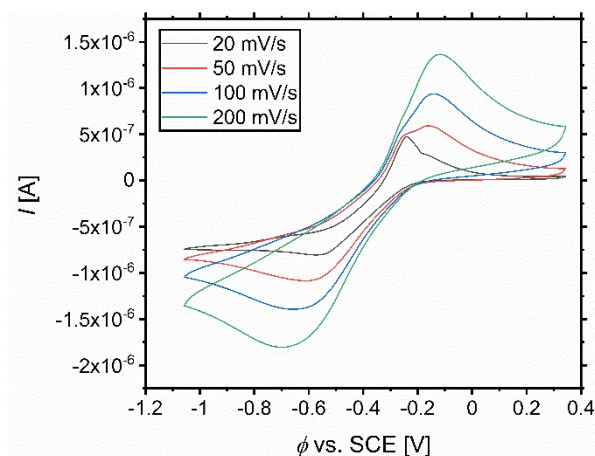

**Fig. S9:** Cyclic voltammograms with various scan rates of the Cu<sup>I</sup>/Cu<sup>II</sup> couple starting from a 1 mM [Cu(TMG<sub>3</sub>tren)Br]Br (**C4**) complex solution in MeCN.

**Table S4** Additional data and parameters to the cyclic voltammograms of the Cu<sup>I</sup>/Cu<sup>II</sup> couple using **L1** starting from 1 mM copper(II) bromide complex solution (**C1**) in MeCN.

|                                                                                       | 20 mV/s                | 50 mV/s                | 100 mV/s               | 200 mV/s               |
|---------------------------------------------------------------------------------------|------------------------|------------------------|------------------------|------------------------|
| $E_{ox}$ vs. SCE [V]                                                                  | -0.437                 | -0.433                 | -0.429                 | -0.423                 |
| $E_{red}$ vs. SCE [V]                                                                 | -0.522                 | -0.526                 | -0.528                 | -0.532                 |
| $E_{1/2}$ vs. SCE [V]                                                                 | -0.479                 | -0.479                 | -0.478                 | -0.477                 |
| $\Delta E$ [V]                                                                        | 0.085                  | 0.093                  | 0.099                  | 0.109                  |
| $I_{ox}$ [A]                                                                          | $6.47 \times 10^{-7}$  | $9.32 \times 10^{-7}$  | $1.22 \times 10^{-6}$  | $1.59 \times 10^{-6}$  |
| $I_{red}$ [A]                                                                         | $-6.47 \times 10^{-7}$ | $-9.81 \times 10^{-7}$ | $-1.35 \times 10^{-6}$ | $-1.83 \times 10^{-6}$ |
| $I_{red}/I_{ox}$                                                                      | -1.01                  | -1.05                  | -1.10                  | -1.15                  |
| Current function (ox)<br>[ $\mu\text{A V}^{-0.5} \text{s}^{0.5} \text{mmol}^{-1}$ I]  | $4.53 \times 10^{-6}$  | $4.17 \times 10^{-6}$  | $3.87 \times 10^{-6}$  | $3.56 \times 10^{-6}$  |
| Current function (red)<br>[ $\mu\text{A V}^{-0.5} \text{s}^{0.5} \text{mmol}^{-1}$ I] | $-4.57 \times 10^{-6}$ | $-4.39 \times 10^{-6}$ | $-4.25 \times 10^{-6}$ | $-4.09 \times 10^{-6}$ |

**Table S5** Additional data and parameters to the cyclic voltammograms of the Cu<sup>I</sup>/Cu<sup>II</sup> couple using **L1** starting from 1 mM copper(II) chloride complex solution (**C2**) in MeCN.

|                                                                                       | 20 mV/s                | 50 mV/s                | 100 mV/s               | 200 mV/s               |
|---------------------------------------------------------------------------------------|------------------------|------------------------|------------------------|------------------------|
| $E_{ox}$ vs. SCE [V]                                                                  | -0.561                 | -0.561                 | -0.561                 | -0.561                 |
| $E_{red}$ vs. SCE [V]                                                                 | -0.636                 | -0.638                 | -0.640                 | -0.646                 |
| $E_{1/2}$ vs. SCE [V]                                                                 | -0.599                 | -0.600                 | -0.601                 | -0.604                 |
| $\Delta E$ [V]                                                                        | 0.075                  | 0.077                  | 0.079                  | 0.085                  |
| $I_{ox}$ [A]                                                                          | $1.47 \times 10^{-6}$  | $2.18 \times 10^{-6}$  | $2.83 \times 10^{-6}$  | $3.59 \times 10^{-6}$  |
| $I_{red}$ [A]                                                                         | $-1.46 \times 10^{-6}$ | $-2.35 \times 10^{-6}$ | $-3.28 \times 10^{-6}$ | $-4.56 \times 10^{-6}$ |
| $I_{red}/I_{ox}$                                                                      | -0.99                  | -1.08                  | -1.16                  | -1.27                  |
| Current function (ox)<br>[ $\mu\text{A V}^{-0.5} \text{s}^{0.5} \text{mmol}^{-1}$ I]  | $1.04 \times 10^{-5}$  | $9.7 \times 10^{-6}$   | $8.9 \times 10^{-6}$   | $8.02 \times 10^{-6}$  |
| Current function (red)<br>[ $\mu\text{A V}^{-0.5} \text{s}^{0.5} \text{mmol}^{-1}$ I] | $-1.03 \times 10^{-5}$ | $-1.05 \times 10^{-5}$ | $-1.04 \times 10^{-5}$ | $-1.02 \times 10^{-5}$ |

**Table S6** Additional data and parameters to the cyclic voltammograms of the Cu<sup>I</sup>/Cu<sup>II</sup>L couple using **L1** starting from 1 mM copper(II) triflate complex solution in MeCN.

|                                                                                        | 20 mV/s                  | 50 mV/s                  | 100 mV/s                 | 200 mV/s                 |
|----------------------------------------------------------------------------------------|--------------------------|--------------------------|--------------------------|--------------------------|
| E <sub>ox</sub> vs. SCE [V]                                                            | -0.334                   | -0.328                   | -0.324                   | -0.320                   |
| E <sub>red</sub> vs. SCE [V]                                                           | -0.418                   | -0.418                   | -0.422                   | -0.418                   |
| E <sub>1/2</sub> vs. SCE [V]                                                           | -0.376                   | -0.373                   | -0.373                   | -0.369                   |
| ΔE [V]                                                                                 | 0.083                    | 0.089                    | 0.097                    | 0.097                    |
| I <sub>ox</sub> [A]                                                                    | 4.37 × 10 <sup>-7</sup>  | 6.74 × 10 <sup>-7</sup>  | 9.10 × 10 <sup>-7</sup>  | 1.22 × 10 <sup>-6</sup>  |
| I <sub>red</sub> [A]                                                                   | -3.72 × 10 <sup>-7</sup> | -5.53 × 10 <sup>-7</sup> | -7.27 × 10 <sup>-7</sup> | -9.37 × 10 <sup>-7</sup> |
| I <sub>red</sub> /I <sub>ox</sub>                                                      | -1.17                    | -1.21                    | -1.25                    | -1.30                    |
| Current function (ox)<br>[μA V <sup>-0.5</sup> s <sup>0.5</sup> mmol <sup>-1</sup> l]  | 3.01 × 10 <sup>-6</sup>  | 3.02 × 10 <sup>-6</sup>  | 2.88 × 10 <sup>-6</sup>  | 2.72 × 10 <sup>-6</sup>  |
| Current function (red)<br>[μA V <sup>-0.5</sup> s <sup>0.5</sup> mmol <sup>-1</sup> l] | -2.63 × 10 <sup>-6</sup> | -2.47 × 10 <sup>-6</sup> | -2.30 × 10 <sup>-6</sup> | -2.10 × 10 <sup>-6</sup> |

**Table S7** Additional data and parameters to the cyclic voltammograms of the Cu<sup>I</sup>/Cu<sup>II</sup>L couple using **L2** starting from 1 mM copper(II) bromide complex solution in MeCN.

|                                                                                        | 20 mV/s                  | 50 mV/s                  | 100 mV/s                 | 200 mV/s                 |
|----------------------------------------------------------------------------------------|--------------------------|--------------------------|--------------------------|--------------------------|
| E <sub>ox</sub> vs. SCE [V]                                                            | -0.330                   | -0.332                   | -0.332                   | -0.332                   |
| E <sub>red</sub> vs. SCE [V]                                                           | -0.410                   | -0.408                   | -0.410                   | -0.410                   |
| E <sub>1/2</sub> vs. SCE [V]                                                           | -0.370                   | -0.370                   | -0.371                   | -0.371                   |
| ΔE [V]                                                                                 | 0.079                    | 0.075                    | 0.077                    | 0.077                    |
| I <sub>ox</sub> [A]                                                                    | 8.19 × 10 <sup>-7</sup>  | 1.27 × 10 <sup>-6</sup>  | 1.73 × 10 <sup>-6</sup>  | 2.33 × 10 <sup>-6</sup>  |
| I <sub>red</sub> [A]                                                                   | -7.31 × 10 <sup>-7</sup> | -1.14 × 10 <sup>-6</sup> | -1.59 × 10 <sup>-6</sup> | -2.25 × 10 <sup>-6</sup> |
| I <sub>red</sub> /I <sub>ox</sub>                                                      | -0.89                    | -0.90                    | -0.924                   | -0.966                   |
| Current function (ox)<br>[μA V <sup>-0.5</sup> s <sup>0.5</sup> mmol <sup>-1</sup> l]  | 5.79 × 10 <sup>-6</sup>  | 5.66 × 10 <sup>-6</sup>  | 5.46 × 10 <sup>-6</sup>  | 5.20 × 10 <sup>-6</sup>  |
| Current function (red)<br>[μA V <sup>-0.5</sup> s <sup>0.5</sup> mmol <sup>-1</sup> l] | -5.17 × 10 <sup>-6</sup> | -5.09 × 10 <sup>-6</sup> | -5.04 × 10 <sup>-6</sup> | -5.02 × 10 <sup>-6</sup> |

**Table S8** Additional data and parameters to the cyclic voltammograms of the Cu<sup>I</sup>/Cu<sup>II</sup>L couple using **L3** starting from 1 mM copper(II) bromide complex solution in MeCN.

|                                                                                        | 20 mV/s                  | 50 mV/s                  | 100 mV/s                 | 200 mV/s                 |
|----------------------------------------------------------------------------------------|--------------------------|--------------------------|--------------------------|--------------------------|
| E <sub>ox</sub> vs. SCE [V]                                                            | -0.241                   | -0.172                   | -0.154                   | -0.132                   |
| E <sub>red</sub> vs. SCE [V]                                                           | -0.543                   | -0.568                   | -0.595                   | -0.630                   |
| E <sub>1/2</sub> vs. SCE [V]                                                           | -0.392                   | -0.370                   | -0.374                   | -0.381                   |
| ΔE [V]                                                                                 | 0.302                    | 0.397                    | 0.440                    | 0.497                    |
| I <sub>ox</sub> [A]                                                                    | 8.11 × 10 <sup>-7</sup>  | 8.19 × 10 <sup>-7</sup>  | 1.09 × 10 <sup>-6</sup>  | 1.39 × 10 <sup>-6</sup>  |
| I <sub>red</sub> [A]                                                                   | -4.80 × 10 <sup>-7</sup> | -6.75 × 10 <sup>-7</sup> | -8.58 × 10 <sup>-7</sup> | -1.06 × 10 <sup>-6</sup> |
| I <sub>red</sub> /I <sub>ox</sub>                                                      | -0.59                    | -0.82                    | -0.78                    | -0.76                    |
| Current function (ox)<br>[μA V <sup>-0.5</sup> s <sup>0.5</sup> mmol <sup>-1</sup> l]  | 5.73 × 10 <sup>-6</sup>  | 3.66 × 10 <sup>-6</sup>  | 3.44 × 10 <sup>-6</sup>  | 3.11 × 10 <sup>-6</sup>  |
| Current function (red)<br>[μA V <sup>-0.5</sup> s <sup>0.5</sup> mmol <sup>-1</sup> l] | -3.39 × 10 <sup>-6</sup> | -3.01 × 10 <sup>-6</sup> | -2.71 × 10 <sup>-6</sup> | -2.36 × 10 <sup>-6</sup> |

# NMR spectra

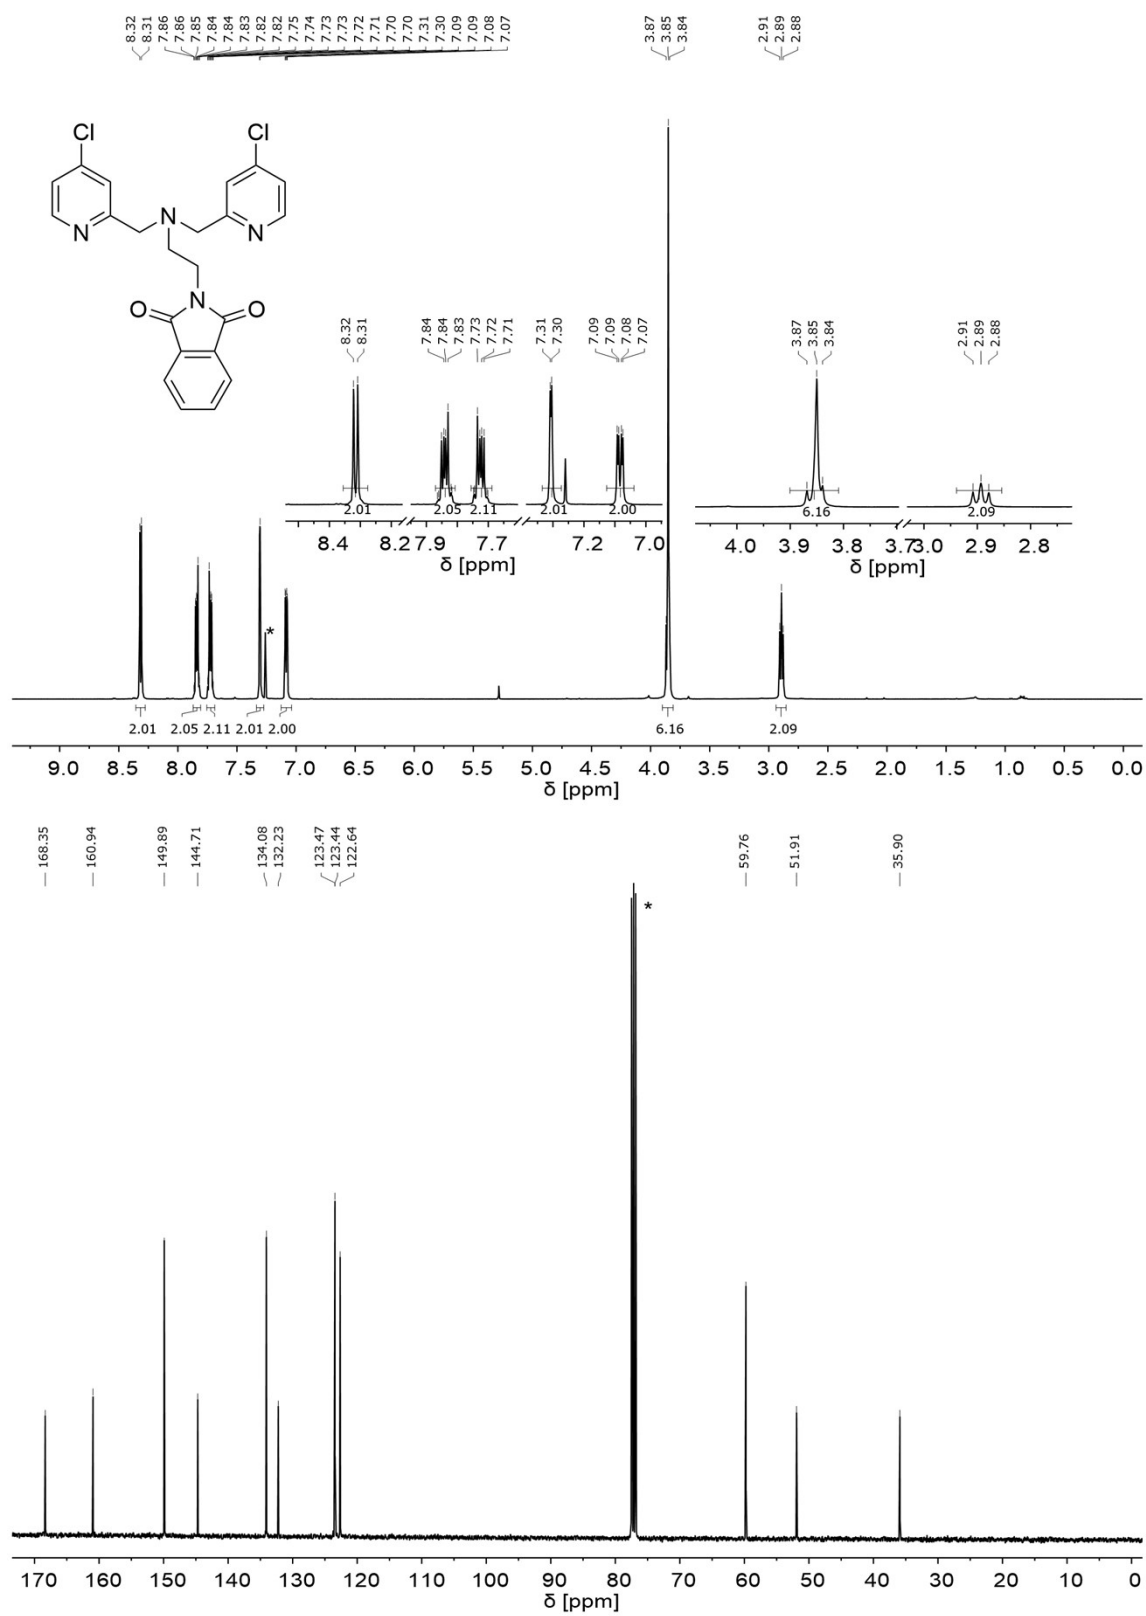

Fig. S10: <sup>1</sup>H-NMR (top) and <sup>13</sup>C-NMR (bottom) spectrum for 2-(2-bis((4-chloropyridin-2-yl)methyl)amino)ethyl)isoindoline-1,3-dione (**3**) in CDCl<sub>3</sub>. \*: CDCl<sub>3</sub>.

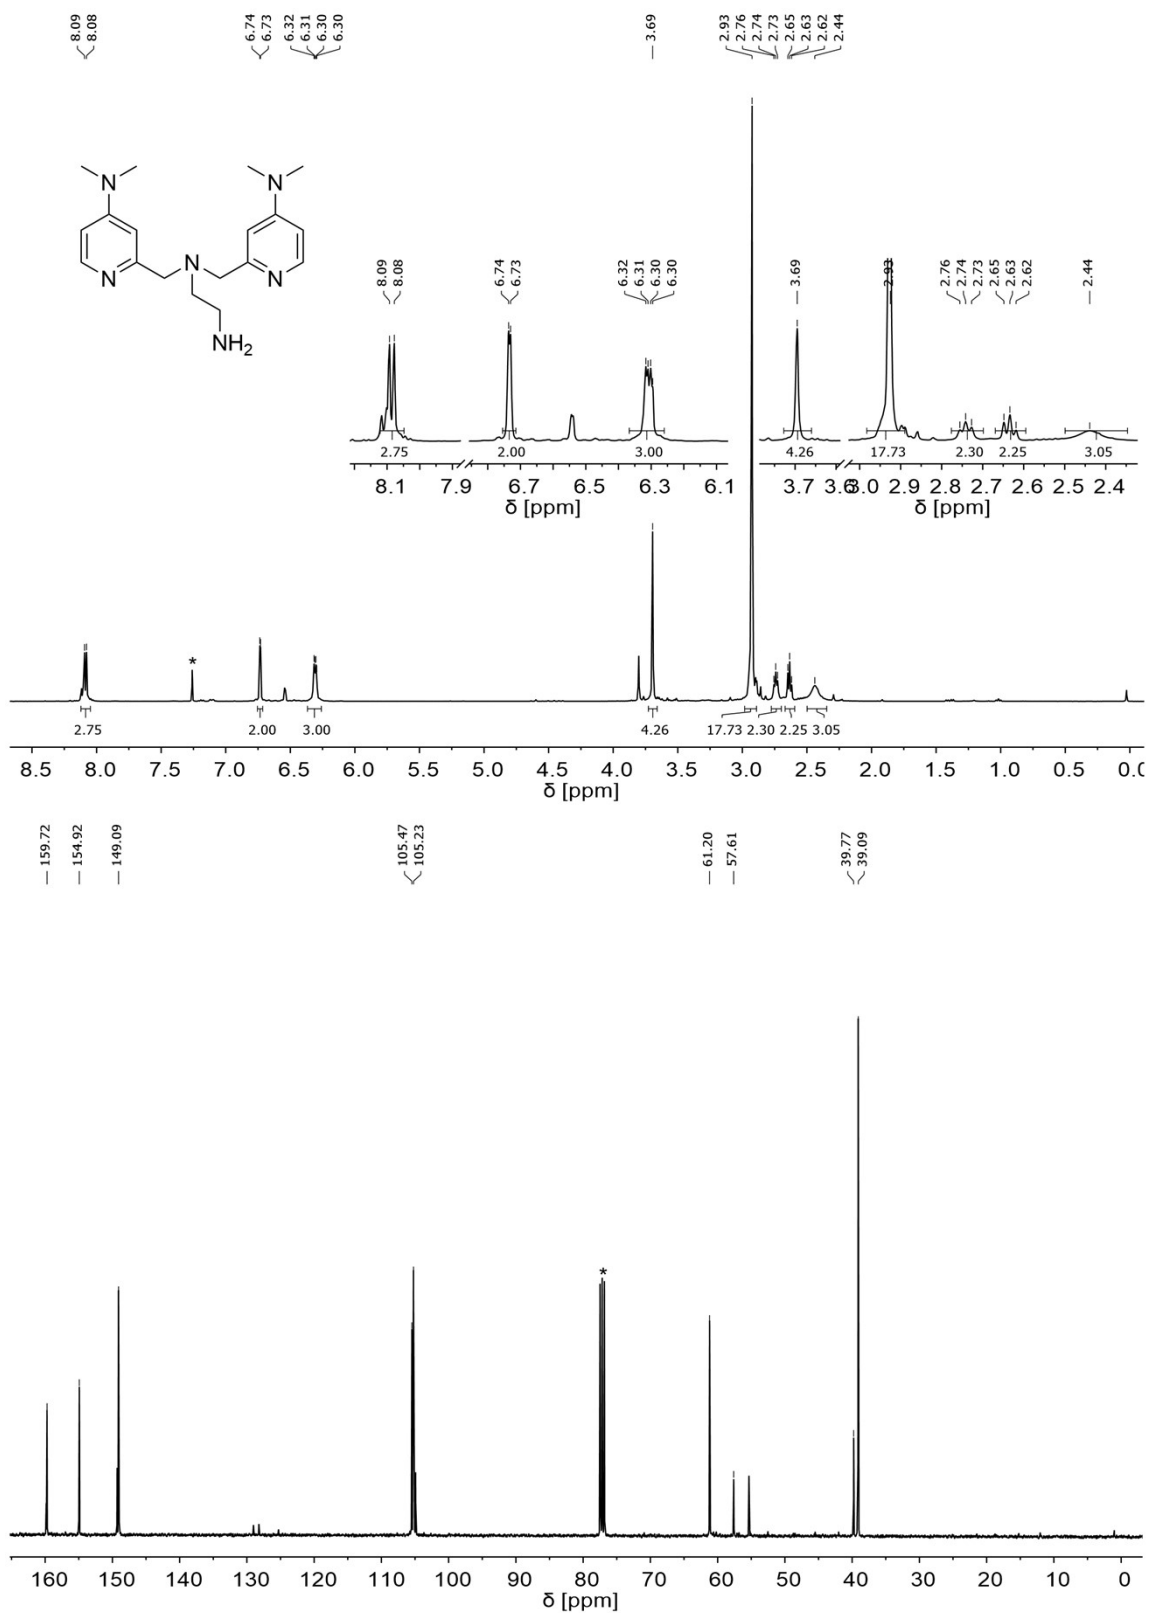

Fig. S11: <sup>1</sup>H-NMR (top) and <sup>13</sup>C-NMR (bottom) spectrum for *N,N'*-bis((4-(dimethylamino)pyridin-2-yl)methyl)ethane-1,2-diamine (**4**) in CDCl<sub>3</sub>. \*: CDCl<sub>3</sub>.

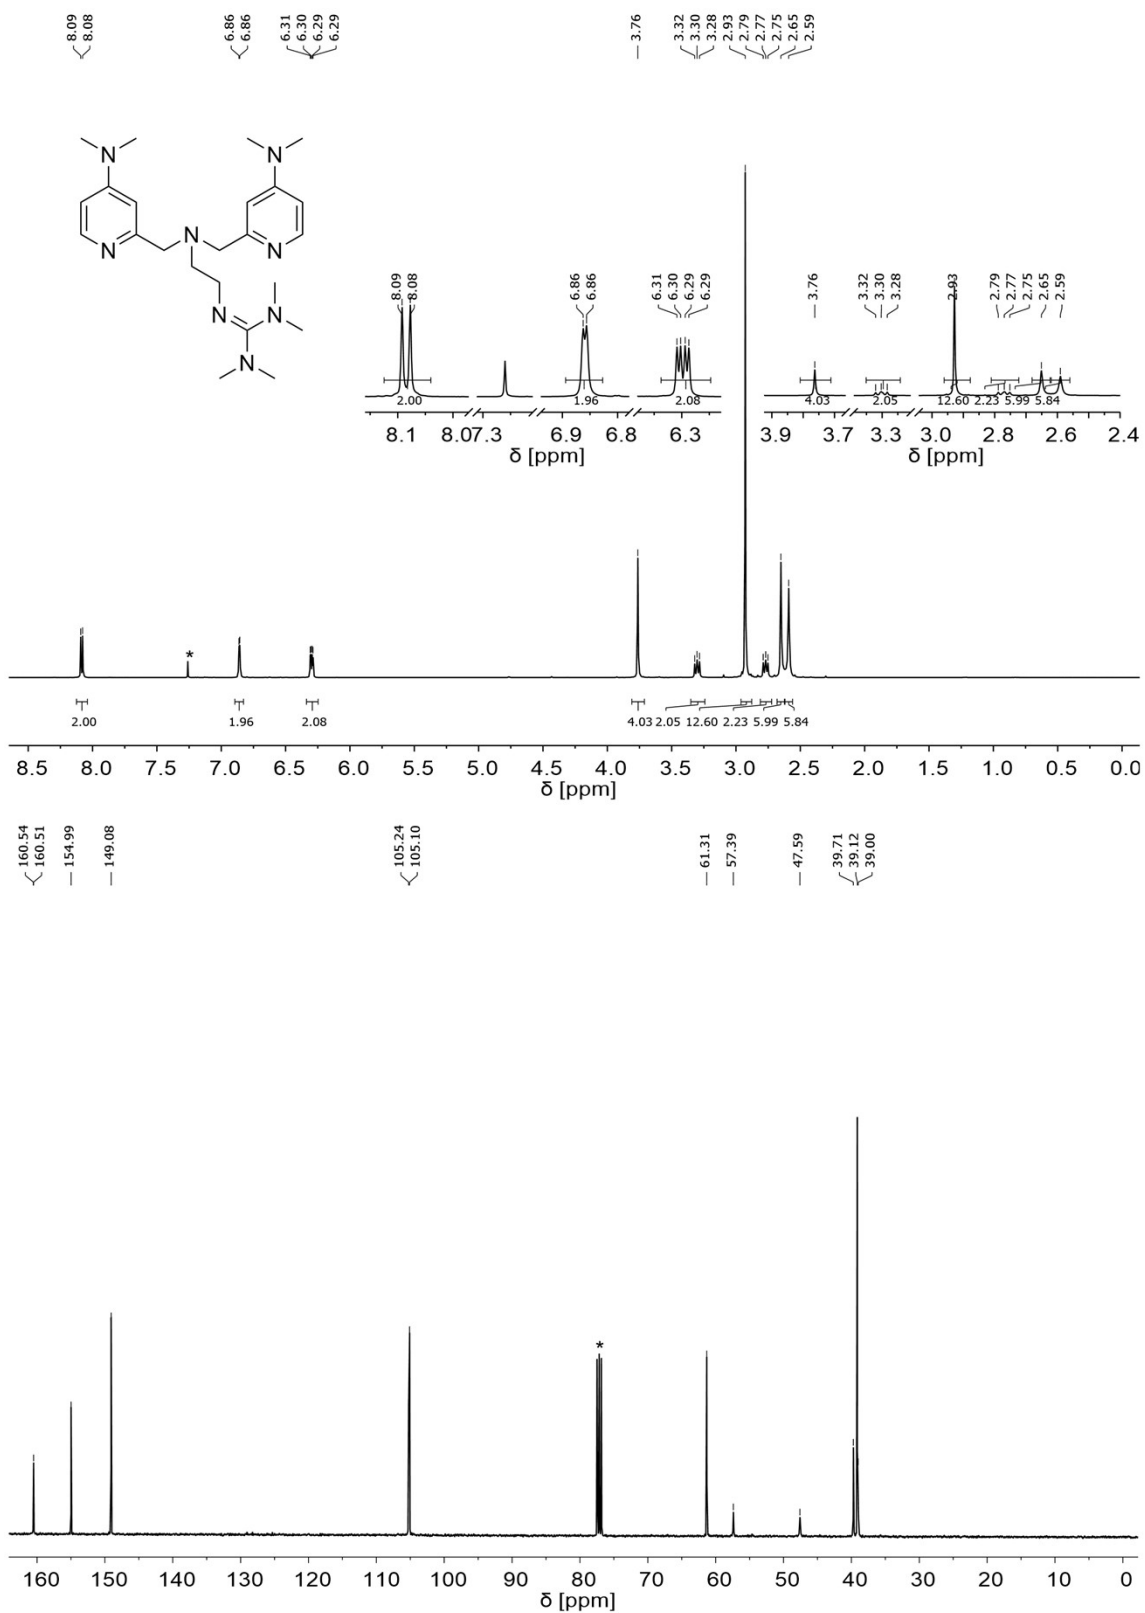

Fig. S12: <sup>1</sup>H-NMR (top) and <sup>13</sup>C-NMR (bottom) spectrum for TMG-4NMe<sub>2</sub>uns-penp (L1) in CDCl<sub>3</sub>. \*: CDCl<sub>3</sub>.

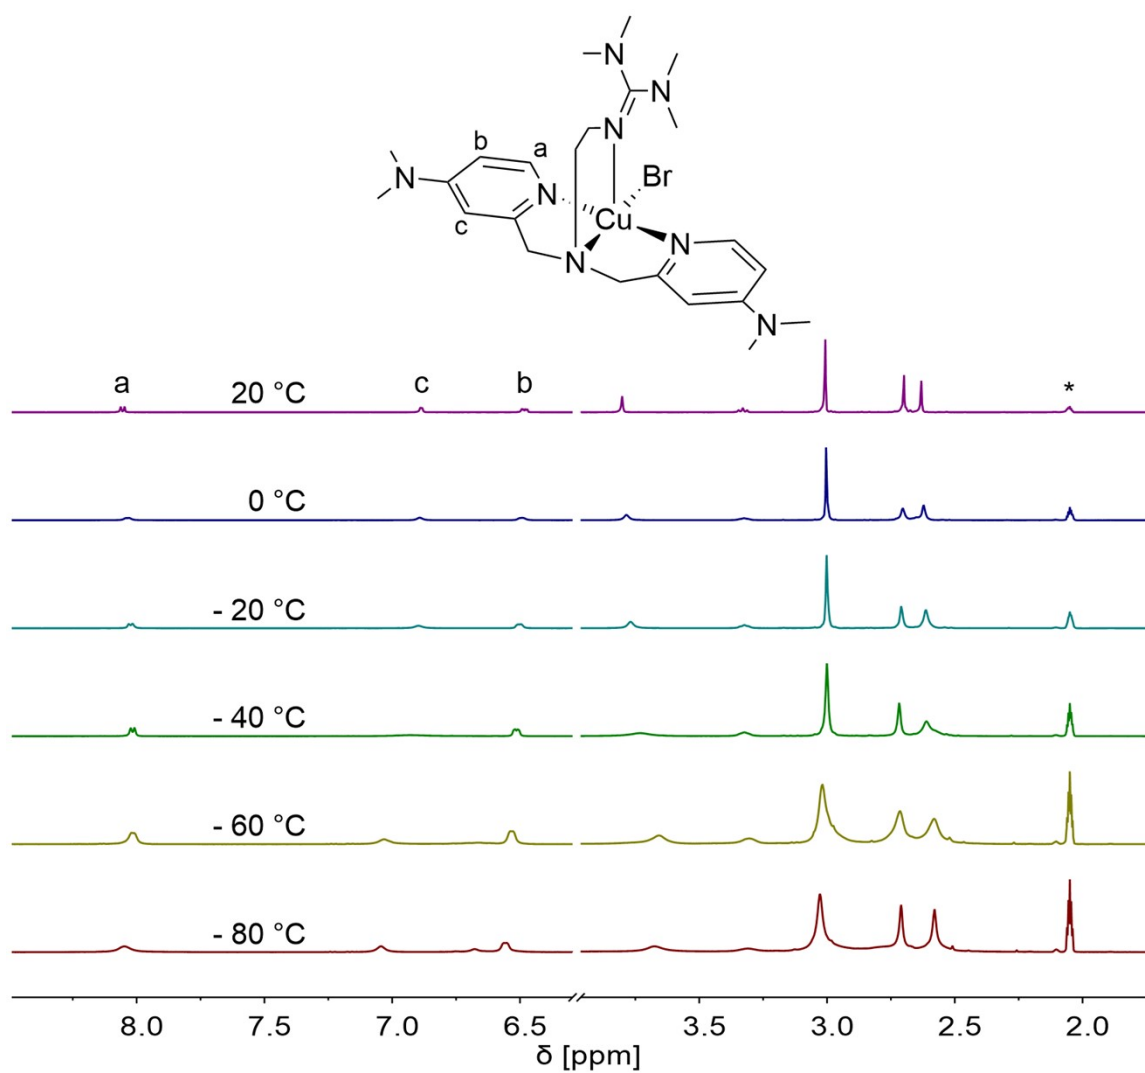

**Fig. S13:** Variable-temperature  $^1\text{H-NMR}$  spectra of the L1 based CuBr complex in  $d_6$ -acetone at a molar ratio of  $[\text{CuBr}]:[\text{L1}] = 1:3$ . \*:  $d_6$ -acetone.

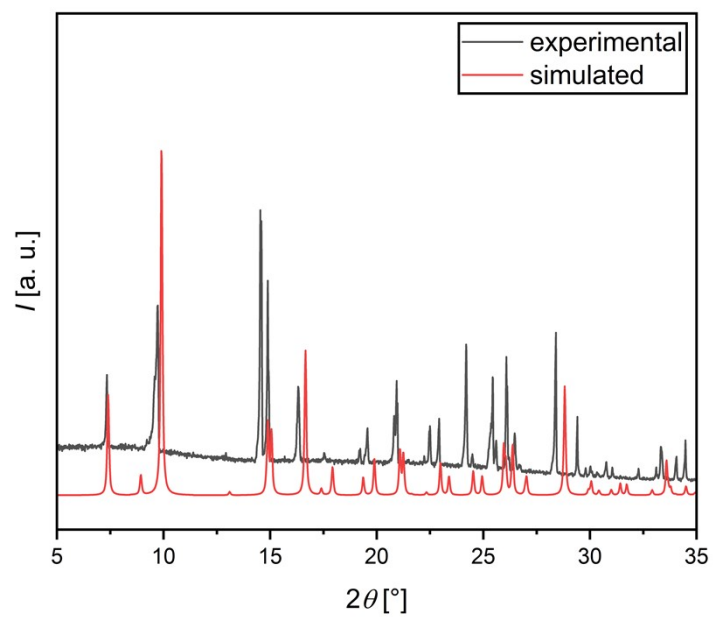

Fig. S14: Experimental and simulated PXRD spectra of C5.

## PXRD spectrum

## DFT calculations of the complex cations

**Table S9:** XRD and DFT calculated key bond lengths, angles and geometrical factors of the copper(II) deactivator complexes in **C1**, **C3**, **C4**, [Cu(TPMA<sup>NMe2</sup>)Br]<sup>+</sup> and [Cu(TPMA)Br]<sup>+</sup>.<sup>8,9</sup>

| DFT                                            |                                              |                                              |                                               |                                               |                                            |
|------------------------------------------------|----------------------------------------------|----------------------------------------------|-----------------------------------------------|-----------------------------------------------|--------------------------------------------|
| Complex                                        | Cation in C1                                 | Cation in C3                                 | Cation in C4                                  | [Cu(TPMA <sup>NMe2</sup> )Br] <sup>+</sup>    | [Cu(TPMA)Br] <sup>+</sup>                  |
| <b>Bond lengths [Å]</b>                        |                                              |                                              |                                               |                                               |                                            |
| Cu-N <sub>ax</sub>                             | 2.224; N <sub>ax</sub> = N <sub>GUA</sub>    | 2.231; N <sub>ax</sub> = N <sub>py</sub>     | 2.136; N <sub>ax</sub> = N <sub>tert</sub>    | 2.070; N <sub>ax</sub> = N <sub>tert</sub>    | 2.066; N <sub>ax</sub> = N <sub>tert</sub> |
| Cu-N <sub>b/eq</sub> (1)                       | 2.107; N <sub>b</sub> = N <sub>tert</sub>    | 2.122; N <sub>b</sub> = N <sub>tert</sub>    | 2.092; N <sub>eq</sub> = N <sub>GUA</sub>     | 2.064; N <sub>eq</sub> = N <sub>py</sub>      | 2.072; N <sub>eq</sub> = N <sub>py</sub>   |
| Cu-N <sub>b/eq</sub> (2)                       | 2.002; N <sub>b</sub> = N <sub>py</sub>      | 1.972; N <sub>b</sub> = N <sub>GUA</sub>     | 2.092; N <sub>eq</sub> = N <sub>GUA</sub>     | 2.064; N <sub>eq</sub> = N <sub>py</sub>      | 2.073; N <sub>eq</sub> = N <sub>py</sub>   |
| Cu-N <sub>b/eq</sub> (3)                       | 2.009; N <sub>b</sub> = N <sub>py</sub>      | 2.025; N <sub>b</sub> = N <sub>py</sub>      | 2.092; N <sub>eq</sub> = N <sub>GUA</sub>     | 2.064; N <sub>eq</sub> = N <sub>py</sub>      | 2.072 N <sub>eq</sub> = N <sub>py</sub>    |
| Cu-Br                                          | 2.455                                        | 2.443                                        | 2.473                                         | 2.423                                         | 2.405                                      |
| <b>Bond angles [°]</b>                         |                                              |                                              |                                               |                                               |                                            |
| N <sub>ax</sub> -Cu-Br                         | 113.5                                        | 97.3                                         | 180.0                                         | 180.0                                         | 179.9                                      |
| N <sub>b/eq</sub> (1)-Cu-Br                    | 163.8                                        | 175.9                                        | 98.2                                          | 99.3                                          | 99.3                                       |
| N <sub>ax</sub> -Cu-N <sub>b/eq</sub> (1)      | 82.5                                         | 79.4                                         | 81.8                                          | 80.7                                          | 80.7                                       |
| N <sub>ax</sub> -Cu-N <sub>b/eq</sub> (2)      | 104.9                                        | 96.3                                         | 81.8                                          | 80.7                                          | 80.7                                       |
| N <sub>ax</sub> -Cu-N <sub>b/eq</sub> (3)      | 88.0                                         | 104.9                                        | 81.8                                          | 80.7                                          | 80.7                                       |
| N <sub>b/eq</sub> (1)-Cu-N <sub>b/eq</sub> (2) | 81.2                                         | 83.2                                         | 118.0                                         | 117.3                                         | 117.6                                      |
| N <sub>b/eq</sub> (1)-Cu-N <sub>b/eq</sub> (3) | 82.3                                         | 80.3                                         | 118.0                                         | 117.3                                         | 117.3                                      |
| N <sub>b/eq</sub> (2)-Cu-N <sub>b/eq</sub> (3) | 157.5                                        | 150.1                                        | 118.0                                         | 117.7                                         | 117.5                                      |
| <b>Geometrical factor</b>                      |                                              |                                              |                                               |                                               |                                            |
| τ <sub>5</sub> <sup>[a]</sup>                  | 0.11                                         | 0.43                                         | 1.03                                          | 1.04                                          | 1.03                                       |
| <b>XRD</b>                                     |                                              |                                              |                                               |                                               |                                            |
| Complex                                        | C1                                           | C3                                           | C4                                            | [Cu(TPMA <sup>NMe2</sup> )Br]Br               | [Cu(TPMA)Br]Br                             |
| <b>Bond lengths [Å]</b>                        |                                              |                                              |                                               |                                               |                                            |
| Cu-N <sub>ax</sub>                             | 2.188(2); N <sub>ax</sub> = N <sub>GUA</sub> | 2.231(4); N <sub>ax</sub> = N <sub>py</sub>  | 2.112(3); N <sub>ax</sub> = N <sub>tert</sub> | 2.047(3); N <sub>ax</sub> = N <sub>tert</sub> | 2.066; N <sub>ax</sub> = N <sub>tert</sub> |
| Cu-N <sub>b/eq</sub> (1)                       | 2.088(2); N <sub>b</sub> = N <sub>tert</sub> | 2.082(4); N <sub>b</sub> = N <sub>tert</sub> | 2.061(3); N <sub>eq</sub> = N <sub>GUA</sub>  | 2.051(2); N <sub>eq</sub> = N <sub>py</sub>   | 2.072; N <sub>eq</sub> = N <sub>py</sub>   |
| Cu-N <sub>b/eq</sub> (2)                       | 2.010(2); N <sub>b</sub> = N <sub>py</sub>   | 1.970(4); N <sub>b</sub> = N <sub>GUA</sub>  | 2.065(3); N <sub>eq</sub> = N <sub>GUA</sub>  | 2.108(3); N <sub>eq</sub> = N <sub>py</sub>   | 2.073; N <sub>eq</sub> = N <sub>py</sub>   |
| Cu-N <sub>b/eq</sub> (3)                       | 2.020(2); N <sub>b</sub> = N <sub>py</sub>   | 2.031(4); N <sub>b</sub> = N <sub>py</sub>   | 2.138(3); N <sub>eq</sub> = N <sub>GUA</sub>  | 2.046(3); N <sub>eq</sub> = N <sub>py</sub>   | 2.072 N <sub>eq</sub> = N <sub>py</sub>    |
| Cu-Br                                          | 2.438(1)                                     | 2.394(1)                                     | 2.447(1)                                      | 2.390(1)                                      | 2.405                                      |
| <b>Bond angles [°]</b>                         |                                              |                                              |                                               |                                               |                                            |
| N <sub>ax</sub> -Cu-Br                         | 101.9(1)                                     | 99.4(1)                                      | 179.4(1)                                      | 179.9(1)                                      | 180.0(1)                                   |
| N <sub>b/eq</sub> (1)-Cu-Br                    | 174.7(1)                                     | 177.2(1)                                     | 98.8(1)                                       | 98.6(1)                                       | 99.1(1)                                    |
| N <sub>ax</sub> -Cu-N <sub>b/eq</sub> (1)      | 83.1(1)                                      | 80.1(2)                                      | 81.8(2)                                       | 80.6(1)                                       | 80.9(1)                                    |
| N <sub>ax</sub> -Cu-N <sub>b/eq</sub> (2)      | 107.7(1)                                     | 95.6(2)                                      | 82.3(2)                                       | 80.6(1)                                       | 80.9(1)                                    |
| N <sub>ax</sub> -Cu-N <sub>b/eq</sub> (3)      | 92.5(1)                                      | 102.8(2)                                     | 81.8(2)                                       | 81.4(1)                                       | 80.9(1)                                    |
| N <sub>b/eq</sub> (1)-Cu-N <sub>b/eq</sub> (2) | 82.2(1)                                      | 84.0(2)                                      | 122.3(2)                                      | 126.6(1)                                      | 117.5(1)                                   |
| N <sub>b/eq</sub> (1)-Cu-N <sub>b/eq</sub> (3) | 82.2(1)                                      | 80.3(2)                                      | 113.1(2)                                      | 116.3(1)                                      | 117.5(1)                                   |
| N <sub>b/eq</sub> (2)-Cu-N <sub>b/eq</sub> (3) | 152.6(1)                                     | 153.3(2)                                     | 118.8(2)                                      | 109.4(1)                                      | 117.5(1)                                   |
| <b>Geometrical factor</b>                      |                                              |                                              |                                               |                                               |                                            |
| τ <sub>5</sub> <sup>[a]</sup>                  | 0.37                                         | 0.36                                         | 1.01                                          | 0.89                                          | 1.00                                       |
| RMSD vs. SCXRD [Å]                             | 0.3358                                       | 0.1604                                       | 0.0906                                        | 0.1416                                        | 0.0290                                     |

[a]  $\tau_5 = \frac{(\alpha - \beta)}{60^\circ}$ . Ideal square-pyramidal complexes generate a τ<sub>5</sub> value of 0, whereas ideal trigonal-bipyramidal complexes generate a τ<sub>5</sub> value of 1.<sup>5</sup>

In the DFT optimisation calculation of [Cu(TMG4NMe<sub>2</sub>unspenp)Br]<sup>+</sup> (cation in **C1**), a minimum structure with a N<sub>tert</sub>-Cu-Br bond angle of 163.8° was found which is contrary to the N<sub>tert</sub>-Cu-Br bond angle of 174.8° in the solid state. To verify the found minimum of the DFT optimisation calculation, a Conformer-Rotamer Ensemble Sampling Tool (CREST) calculation was performed.<sup>10,11</sup> The applied theory level was GFN2-xTB.<sup>12,13</sup> To prevent topology changes in the coordination geometry of the CuN<sub>4</sub> unit, constraints on the copper center and the N donors were applied. The minimum structure of the CREST calculation confirms the smaller N<sub>tert</sub>-Cu-Br bond angle found in the DFT optimisation calculation since the CREST calculation found a N<sub>tert</sub>-Cu-Br bond angle of 157.3°. An analogous procedure was applied to complex **C3** to show that the structure obtained describes the true minimum of the DFT optimisation calculation and thus proves the exchange in the coordination of the N donors depending on the dimethylamine substituents on the pyridene.



**Table S10:** XRD and DFT calculated key bond lengths, angles and geometrical factors of the complex cations in **C2** and **C5**.

| Complex                                        | DFT                                       |                                            | XRD                                          |                                               |
|------------------------------------------------|-------------------------------------------|--------------------------------------------|----------------------------------------------|-----------------------------------------------|
|                                                | Cation in C2                              | Cation in C5                               | Cation in C2                                 | Cation in C5                                  |
| <b>Bond lengths [Å]</b>                        |                                           |                                            |                                              |                                               |
| Cu-N <sub>ax</sub>                             | 2.232; N <sub>ax</sub> = N <sub>GUA</sub> | 2.216; N <sub>ax</sub> = N <sub>tert</sub> | 2.201(2); N <sub>ax</sub> = N <sub>GUA</sub> | 2.200(2); N <sub>ax</sub> = N <sub>tert</sub> |
| Cu-N <sub>b/eq</sub> (1)                       | 2.105; N <sub>b</sub> = N <sub>tert</sub> | 2.038; N <sub>b</sub> = N <sub>GUA</sub>   | 2.089(2); N <sub>b</sub> = N <sub>tert</sub> | 2.053(2); N <sub>b</sub> = N <sub>GUA</sub>   |
| Cu-N <sub>b/eq</sub> (2)                       | 2.000; N <sub>b</sub> = N <sub>py</sub>   | 2.038; N <sub>b</sub> = N <sub>GUA</sub>   | 2.009(2); N <sub>b</sub> = N <sub>py</sub>   | 2.053(2); N <sub>b</sub> = N <sub>GUA</sub>   |
| Cu-N <sub>b/eq</sub> (3)                       | 2.008; N <sub>b</sub> = N <sub>py</sub>   | 2.037; N <sub>b</sub> = N <sub>GUA</sub>   | 1.999(2); N <sub>b</sub> = N <sub>py</sub>   | 2.053(2); N <sub>b</sub> = N <sub>GUA</sub>   |
| Cu-Cl                                          | 2.297                                     | -                                          | 2.282(1)                                     | -                                             |
| <b>Bond angles [°]</b>                         |                                           |                                            |                                              |                                               |
| N <sub>ax</sub> -Cu-Br                         | 111.5                                     | -                                          | 102.7(1)                                     | -                                             |
| N <sub>b/eq</sub> (1)-Cu-Br                    | 166.2                                     | -                                          | 174.5(1)                                     | -                                             |
| N <sub>ax</sub> -Cu-N <sub>b/eq</sub> (1)      | 82.2                                      | 84.3                                       | 82.7(1)                                      | 84.1(1)                                       |
| N <sub>ax</sub> -Cu-N <sub>b/eq</sub> (2)      | 88.4                                      | 84.3                                       | 91.7(1)                                      | 84.1(1)                                       |
| N <sub>ax</sub> -Cu-N <sub>b/eq</sub> (3)      | 105.5                                     | 84.2                                       | 108.0(1)                                     | 84.1(1)                                       |
| N <sub>b/eq</sub> (1)-Cu-N <sub>b/eq</sub> (2) | 82.4                                      | 119.0                                      | 82.5(1)                                      | 119.0(1)                                      |
| N <sub>b/eq</sub> (1)-Cu-N <sub>b/eq</sub> (3) | 81.3                                      | 119.0                                      | 82.0(1)                                      | 119.0(1)                                      |
| N <sub>b/eq</sub> (2)-Cu-N <sub>b/eq</sub> (3) | 156.9                                     | 119.0                                      | 153.0(1)                                     | 119.0(1)                                      |
| <b>Geometrical factors</b>                     |                                           |                                            |                                              |                                               |
| $\tau_4^{[a]}/THC_{DA}^{[b]}$                  | -                                         | 0.87/-15.8                                 | -                                            | 0.86/-16.2                                    |
| $\tau_5^{[c]}$                                 | 0.16                                      | -                                          | 0.36                                         | -                                             |

[a]  $\tau_4 = \frac{360^\circ - (\alpha + \beta)}{141^\circ}$ . Ideal square-planar complexes generate a  $\tau_4$  value of 0; whereas ideal tetrahedral complexes generate a  $\tau_4$  value of 1.<sup>14</sup>

[b]  $THC_{DA} = \left(1 - \frac{\sum n = 1 - 6 |109.5^\circ - \theta n|}{90^\circ}\right) \times 100$ . The  $THC_{DA}$  value reaches 100 for ideal tetrahedral complexes and 0 for ideal trigonal-pyramidal complexes.<sup>14</sup>

[c]  $\tau_5 = \frac{(\alpha - \beta)}{60^\circ}$ . Ideal square-pyramidal complexes generate a  $\tau_5$  value of 0, whereas ideal trigonal-bipyramidal complexes generate a  $\tau_5$  value of 1.<sup>5</sup>

**Table S11:** Calculated NBO charges and charge-transfer energies of selected atoms and bonds for the copper(II) deactivator complex cations in **C1**, **C3**, **C4**, [Cu(TPMA<sup>NMe2</sup>)Br]Br and [Cu(TPMA)Br]Br (NBO7 to 0; TPSSh/def2-TZVP and PCM solvent model for acetonitrile and the empirical dispersion correction with Becke-Johnson damping).

| Complex cation in                             | C1                                        | C3                                        | C4                                         | [Cu(TPMA <sup>NMe2</sup> )Br]Br            | [Cu(TPMA)Br]Br                             |
|-----------------------------------------------|-------------------------------------------|-------------------------------------------|--------------------------------------------|--------------------------------------------|--------------------------------------------|
| <b>NBO charges [e units]</b>                  |                                           |                                           |                                            |                                            |                                            |
| Cu                                            | 1.25                                      | 1.23                                      | 1.28                                       | 1.25                                       | 1.24                                       |
| N <sub>ax</sub>                               | -0.69; N <sub>ax</sub> = N <sub>GUA</sub> | -0.53; N <sub>ax</sub> = N <sub>py</sub>  | -0.44; N <sub>ax</sub> = N <sub>tert</sub> | -0.41; N <sub>ax</sub> = N <sub>tert</sub> | -0.41; N <sub>ax</sub> = N <sub>tert</sub> |
| N <sub>b/eq</sub> (1)                         | -0.44; N <sub>b</sub> = N <sub>tert</sub> | -0.43; N <sub>b</sub> = N <sub>tert</sub> | -0.71; N <sub>eq</sub> = N <sub>GUA</sub>  | -0.59; N <sub>eq</sub> = N <sub>py</sub>   | -0.53; N <sub>eq</sub> = N <sub>py</sub>   |
| N <sub>b/eq</sub> (2)                         | -0.57; N <sub>b</sub> = N <sub>py</sub>   | -0.70; N <sub>b</sub> = N <sub>GUA</sub>  | -0.71; N <sub>eq</sub> = N <sub>GUA</sub>  | -0.59; N <sub>eq</sub> = N <sub>py</sub>   | -0.53; N <sub>eq</sub> = N <sub>py</sub>   |
| N <sub>b/eq</sub> (3)                         | -0.57; N <sub>b</sub> = N <sub>py</sub>   | -0.53; N <sub>b</sub> = N <sub>py</sub>   | -0.71; N <sub>eq</sub> = N <sub>GUA</sub>  | -0.59; N <sub>eq</sub> = N <sub>py</sub>   | -0.53; N <sub>eq</sub> = N <sub>py</sub>   |
| Br                                            | -0.74                                     | -0.73                                     | -0.73                                      | -0.72                                      | -0.69                                      |
| <b>E<sub>CT</sub> [kcal mol<sup>-1</sup>]</b> |                                           |                                           |                                            |                                            |                                            |
| N <sub>ax</sub> → Cu                          | 20.6; N <sub>ax</sub> = N <sub>GUA</sub>  | 19.0; N <sub>ax</sub> = N <sub>py</sub>   | 32.6; N <sub>ax</sub> = N <sub>tert</sub>  | 45.8; N <sub>ax</sub> = N <sub>tert</sub>  | 47.7; N <sub>ax</sub> = N <sub>tert</sub>  |
| N <sub>b/eq</sub> (1) → Cu                    | 35.0; N <sub>b</sub> = N <sub>tert</sub>  | 36.0; N <sub>b</sub> = N <sub>tert</sub>  | 27.3; N <sub>eq</sub> = N <sub>GUA</sub>   | 37.1; N <sub>eq</sub> = N <sub>py</sub>    | 34.9; N <sub>eq</sub> = N <sub>py</sub>    |
| N <sub>b/eq</sub> (2) → Cu                    | 54.4; N <sub>b</sub> = N <sub>py</sub>    | 47.1; N <sub>b</sub> = N <sub>GUA</sub>   | 27.3; N <sub>eq</sub> = N <sub>GUA</sub>   | 37.1; N <sub>eq</sub> = N <sub>py</sub>    | 34.9; N <sub>eq</sub> = N <sub>py</sub>    |
| N <sub>b/eq</sub> (3) → Cu                    | 51.2; N <sub>b</sub> = N <sub>py</sub>    | 47.8; N <sub>b</sub> = N <sub>py</sub>    | 27.3; N <sub>eq</sub> = N <sub>GUA</sub>   | 36.9; N <sub>eq</sub> = N <sub>py</sub>    | 34.9; N <sub>eq</sub> = N <sub>py</sub>    |
| E <sub>CT,total</sub>                         | 161.2                                     | 149.9                                     | 114.5                                      | 156.9                                      | 152.4                                      |
| Br → Cu                                       | 89.8                                      | 98.5                                      | 79.9                                       | 115.7                                      | 142.9                                      |

**Table S12:** Calculated NBO charges and charge-transfer energies of selected atoms and bonds for the copper(II) deactivator complex cations in **C2** and **C5**. (NBO7 to.o; TPSSh/def2-TZVP and PCM solvent model for acetonitrile and the empirical dispersion correction with Becke-Johnson damping).

| Complex cations in                                 | <b>C2</b>                 | <b>C5</b>                  |
|----------------------------------------------------|---------------------------|----------------------------|
| <b>NBO charges [e units]</b>                       |                           |                            |
| Cu                                                 | 1.28                      | 0.90                       |
| $N_{ax}$                                           | -0.69; $N_{ax} = N_{GUA}$ | -0.50; $N_{ax} = N_{tert}$ |
| $N_{b/eq}$ (1)                                     | -0.44; $N_b = N_{tert}$   | -0.68; $N_b = N_{GUA}$     |
| $N_{b/eq}$ (2)                                     | -0.57; $N_b = N_{py}$     | -0.68; $N_b = N_{GUA}$     |
| $N_{b/eq}$ (3)                                     | -0.57; $N_b = N_{py}$     | -0.68; $N_b = N_{GUA}$     |
| Cl                                                 | -0.76                     | -                          |
| <b><math>E_{CT}</math> [kcal mol<sup>-1</sup>]</b> |                           |                            |
| $N_{ax} \rightarrow Cu$                            | 19.7; $N_{ax} = N_{GUA}$  | 4.1; $N_{ax} = N_{tert}$   |
| $N_{b/eq}$ (1) $\rightarrow Cu$                    | 36.1; $N_b = N_{tert}$    | 21.1; $N_b = N_{GUA}$      |
| $N_{b/eq}$ (2) $\rightarrow Cu$                    | 54.6; $N_b = N_{py}$      | 21.1; $N_b = N_{GUA}$      |
| $N_{b/eq}$ (3) $\rightarrow Cu$                    | 51.1; $N_b = N_{py}$      | 21.1; $N_b = N_{GUA}$      |
| $E_{CT,total}$                                     | 161.5                     | 67.4                       |
| Cl $\rightarrow Cu$                                | 84.5                      | -                          |

## Polymerisations

### ATRP

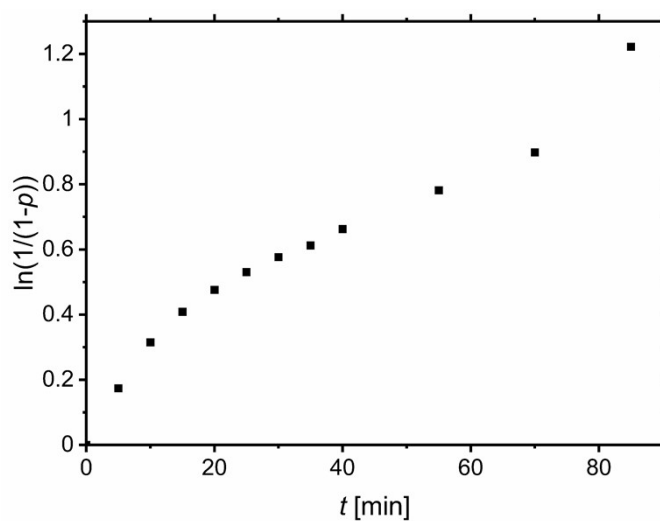

**Fig. S15:** Semilogarithmic plot of conversion vs. time for styrene ATRP with the CuBr/TMG-4NMe<sub>2</sub>uns-penp catalyst system. Conditions: Styrene/EBiB/Cat. =

## ICAR ATRP

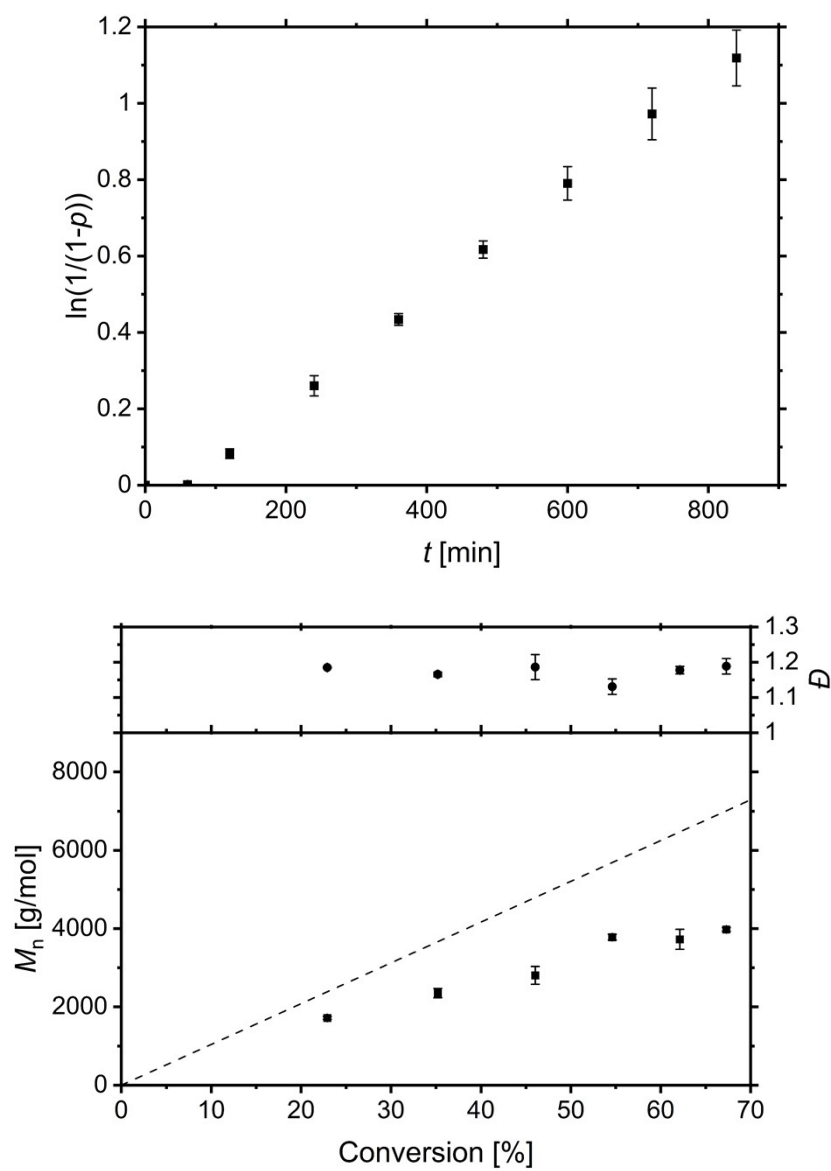

**Fig. S16:** Semilogarithmic plot of conversion vs. time (top) and plot of  $M_n/D$  vs. conversion (bottom) for ICAR ATRP of styrene with the  $\text{CuBr}_2/\mathbf{L3}$  catalyst system. Conditions: Styrene/EBIB/Cat./AIBN = 100/1/0.1/1.5 in benzonitrile at 60 °C.

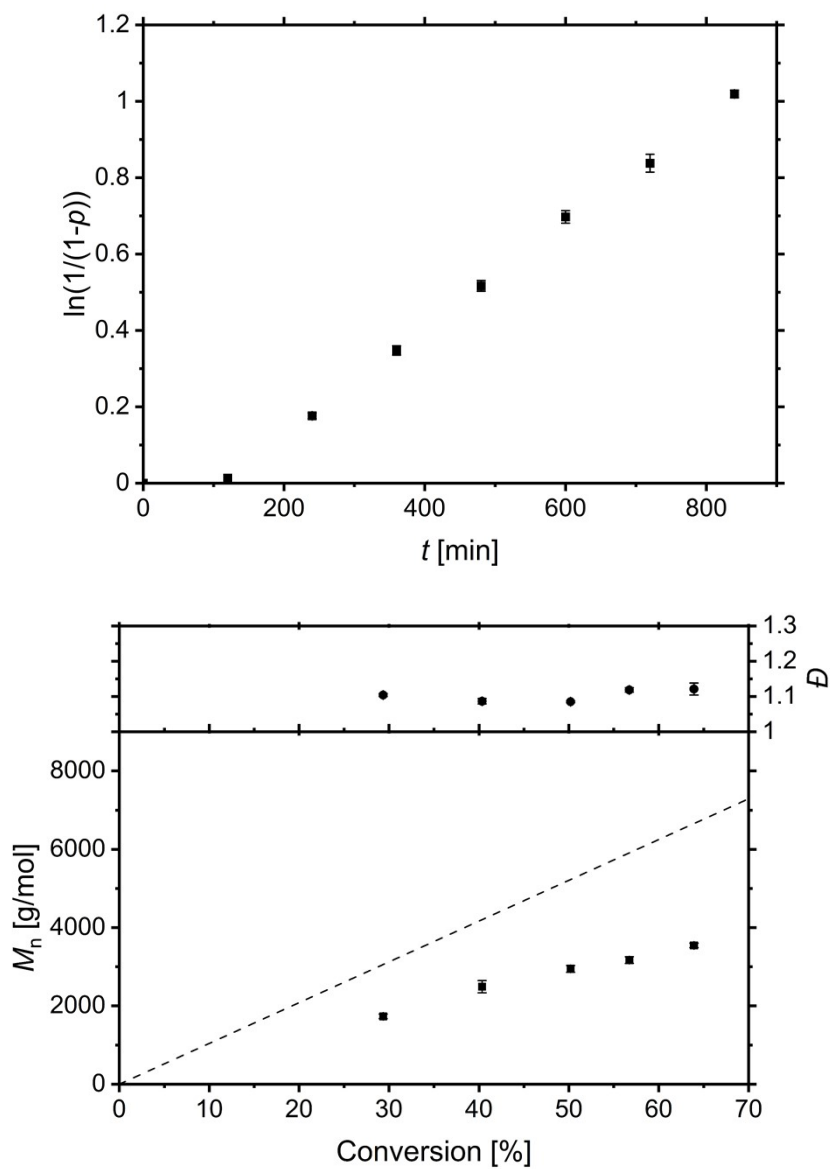

**Fig. S17:** Semilogarithmic plot of conversion vs. time (top) and plot of  $M_n/D$  vs. conversion (bottom) for ICAR ATRP of styrene with the  $\text{CuBr}_2/\text{TPMA}$  catalyst system. Conditions: Styrene/EBiB/Cat./AIBN = 100/1/0.1/1.5 in benzonitrile at 60 °C.

## Ligand structures

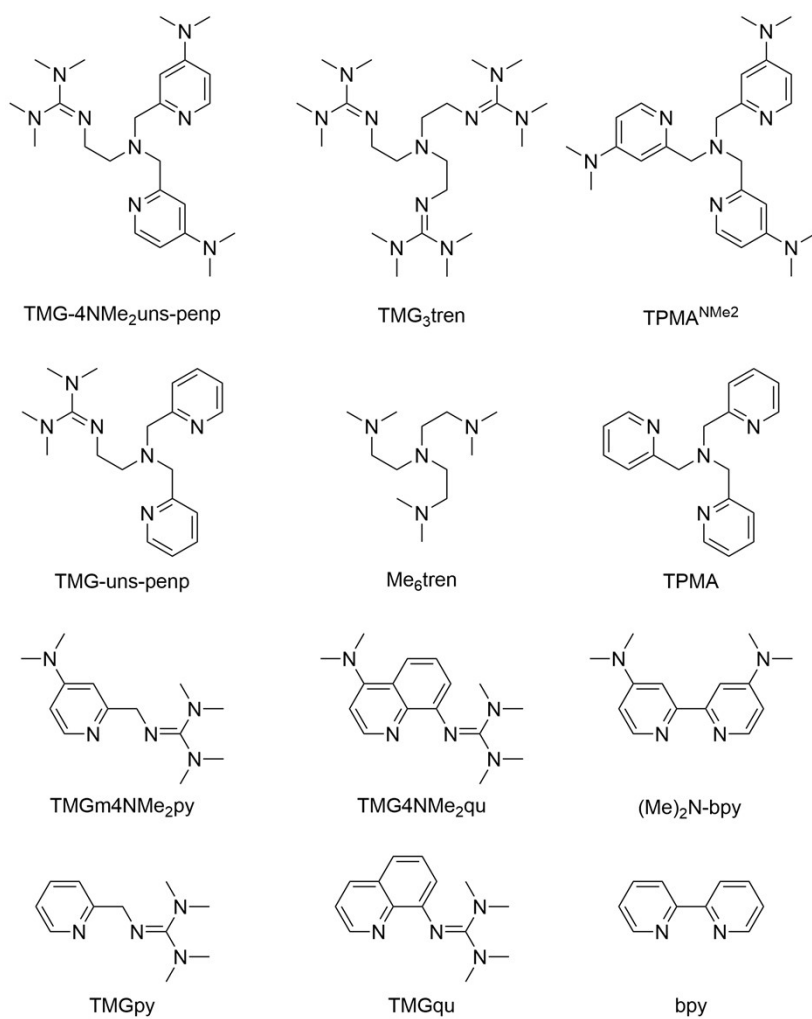

Fig. S18 Various ligand structures and their short names.

## References

- 1 L. I. Manasieva, B. U. Maria, A. Prandi, L. Brasili, S. Franchini, *Synthesis* **2015**, *47*, 3767-3775.
- 2 R. L. Lucas, M. K. Zart, J. Murkerjee, T. N. Sorrell, D. R. Powell, A. S. Borovik, *J. Am. Chem. Soc.* **2006**, *128*, 15476-15489.
- 3 M. Mori, M. C. Dasso Lang, F. Saladini, N. Palombi, L. Kovalenko, D. De Forni, B. Poddesu, L. Friggeri, A. Giannini, S. Malancona, V. Summa, M. Zazzi, Y. Mely, M. Botta, *ACS Med. Chem. Lett.* **2019**, *10*, 463-468.
- 4 H. Fuchida, S. Tabata, N. Shindo, I. Takashima, Q. Leng, Y. Hatsuyama, I. Hamachi, A. Ojida, *Bull. Chem. Soc. Jpn.* **2015**, *88*, 784-791.
- 5 A. W. Addison, T. N. Rao, J. Reedijk, J. van Rijn, G. C. Verschoor, *J. Chem. Soc., Dalton Trans.* **1984**, 1349-1356.
- 6 V. Raab, K. Harms, J. Sundermeyer, B. Kovačević, Z. B. Maksić, *J. Org. Chem.* **2003**, *68*, 8790-8797.
- 7 T. G. Ribelli, M. Fantin, J.-C. Daran, K. F. Augustine, R. Poli, K. Matyjaszewski, *J. Am. Chem. Soc.* **2018**, *140*, 1525-1534.
- 8 W. T. Eckenhoff, S. T. Garrity, T. Pintauer, *Eur. J. Inorg. Chem.* **2008**, *2008*, 563-571.
- 9 W. T. Eckenhoff, T. Pintauer, *Inorg. Chem.* **2010**, *49*, 10617-10626.
- 10 P. Pracht, F. Bohle, S. Grimme, *Phys. Chem. Chem. Phys.* **2020**, *22*, 7169-7192.
- 11 C. Plett, S. Grimme, *Angew. Chem. Int. Ed.* **2023**, *62*, e202214477; *Angew. Chem.* **2023**, *135*, e202214477.
- 12 S. Grimme, *J. Chem. Theory Comput.* **2019**, *15*, 2847-2862.
- 13 S. Spicher, C. Plett, P. Pracht, A. Hansen, S. Grimme, *J. Chem. Theory Comput.* **2022**, *18*, 3174-3189.
- 14 L. Yang, D. R. Powell, R. P. Houser, *Dalton Trans.* **2007**, 955-964.
